# Supplementary material for: Recycling gold and copper from waste printed circuit boards using chlorination process
Source: Royal Society of Chemistry journal article supplement (doi:10.1039/c4ra16231e), 2014-12-24
Supplement: c4ra16231e1.pdf [file c4ra16231e1.pdf]

**Table S1** The concentration of main metallic elements in leaching liquor L<sub>2</sub>

| <b>Leaching<br/>Condition</b> | <b>Concentration in Leaching Liquor (mg L<sup>-1</sup>)</b> |           |           |           |           |           |
|-------------------------------|-------------------------------------------------------------|-----------|-----------|-----------|-----------|-----------|
|                               | <b>Au</b>                                                   | <b>Cu</b> | <b>Fe</b> | <b>Al</b> | <b>Pb</b> | <b>Ni</b> |
| 1 h, 150 g/L, 40 °C           | 26.41                                                       | 6.74      | 13.03     | 9.47      | 7.37      | 0.85      |
| 2 h, 150 g/L, 40 °C           | 24.77                                                       | 6.72      | 11.32     | 9.37      | 7.52      | 0.75      |
| 3 h, 150 g/L, 40 °C           | 22.26                                                       | 7.29      | 7.85      | 7.90      | 7.97      | 0.84      |
| 4 h, 150 g/L, 40 °C           | 17.75                                                       | 11.49     | 7.59      | 13.37     | 7.96      | 0.91      |
| 5 h, 150 g/L, 40 °C           | 14.16                                                       | 12.00     | 8.12      | 11.62     | 7.52      | 0.90      |
| 2 h, 50 g/L, 40 °C            | 13.08                                                       | 6.65      | 1.69      | 7.94      | 7.51      | 0.73      |
| 2 h, 100 g/L, 40 °C           | 25.27                                                       | 6.08      | 1.51      | 6.86      | 7.86      | 0.81      |
| 2 h, 200 g/L, 40 °C           | 20.32                                                       | 11.02     | 6.24      | 9.53      | 7.21      | 1.06      |
| 2 h, 250 g/L, 40 °C           | 13.99                                                       | 15.25     | 2.97      | 8.65      | 7.11      | 0.85      |
| 2 h, 150 g/L, 30 °C           | 22.14                                                       | 5.48      | 6.42      | 4.74      | 7.03      | 0.84      |
| 2 h, 150 g/L, 50 °C           | 14.98                                                       | 11.57     | 8.28      | 9.76      | 8.02      | 0.90      |
| 2 h, 150 g/L, 60 °C           | 11.24                                                       | 20.52     | 8.34      | 12.15     | 8.44      | 0.92      |
| 2 h, 150 g/L, 70 °C           | 12.33                                                       | 28.59     | 13.30     | 19.97     | 7.97      | 1.01      |
